# Supplementary material for: Ackonc-AWA: A multi-species animal welfare assessment protocol for wild animals under human care to overcome the use of generic welfare checklists
Source: Front Vet Sci. 2022 Dec 8;9:1033821. doi: 10.3389/fvets.2022.1033821 (PMC9773254; doi:10.3389/fvets.2022.1033821)
Supplement: Supplementary file 1 [file Table_1.xlsx]

## Sheet: 1
PLANILLA DE PRESUPUESTO TEMPORAL y ESPACIAL
FECHA: LUGAR: HORA INICIO: OBSERVADOR:
CONDIC. AMB: CANTIDAD DE INDIVIDUOS OBSERVADOS/TOTAL DE INDIVIDUOS: spp:
T	Descanso	Locomoción	Alimentac.	Mantenim.	Estereotipia	Eliminac.	Interac. Amb.	Interac. Soc. No Agon.		Interac. Soc. Agonística		Otros	SECTOR del RECINTO	Observaciones:
								Inter.	Intra.	Inter.	Intra.
0
1
2
3
4
5
6
7
8
9
10
11
12
13
14
15
16
17
18
19
Observaciones:
